# Supplementary material for: How does comorbidity influence healthcare costs? A population-based cross-sectional study of depression, back pain and osteoarthritis
Source: PubMed Central journal article supplement — BMJ Open. 2012 Apr 25;2(2):e000809. doi: 10.1136/bmjopen-2011-000809 (PMC3341593; doi:10.1136/bmjopen-2011-000809), 2012-04-25
Supplement: bmjopen-2011-000809.draft_revisions.pdf [file bmjopen-2011-000809.draft_revisions.pdf]

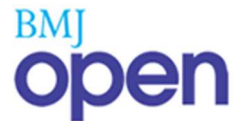

**How does multi-morbidity influence health care costs?  
A population-based cross-sectional study of depression,  
back pain and osteoarthritis**

|                                 |                                                                                                                                                                                                                                                                                                                                                                                                                                                                                                                   |
|---------------------------------|-------------------------------------------------------------------------------------------------------------------------------------------------------------------------------------------------------------------------------------------------------------------------------------------------------------------------------------------------------------------------------------------------------------------------------------------------------------------------------------------------------------------|
| Journal:                        | <i>BMJ Open</i>                                                                                                                                                                                                                                                                                                                                                                                                                                                                                                   |
| Manuscript ID:                  | bmjopen-2011-000809                                                                                                                                                                                                                                                                                                                                                                                                                                                                                               |
| Article Type:                   | Research                                                                                                                                                                                                                                                                                                                                                                                                                                                                                                          |
| Date Submitted by the Author:   | 11-Jan-2012                                                                                                                                                                                                                                                                                                                                                                                                                                                                                                       |
| Complete List of Authors:       | Carstensen, John; Department of Medical and Health Sciences, Health and Society, Linköping University,<br>Andersson, David; Medical and Health Sciences, Linköping University,<br>André, Malin; Medical and Health Sciences, Primary Care Linköping University,<br>Engström, Sven; Medical and Health Sciences, Primary Care, Linköping University,<br>Magnusson, Henrik; Medical and Health Sciences, Linköping University,<br>Borgquist, Lars; Medical and Health Sciences, Primary Care, Linköping University, |
| <b>Primary Subject Heading</b>: | General practice / Family practice                                                                                                                                                                                                                                                                                                                                                                                                                                                                                |
| Secondary Subject Heading:      | Epidemiology, Health services research                                                                                                                                                                                                                                                                                                                                                                                                                                                                            |
| Keywords:                       | multi-morbidity, costs, depression, Back pain < ORTHOPAEDIC & TRAUMA SURGERY                                                                                                                                                                                                                                                                                                                                                                                                                                      |
|                                 |                                                                                                                                                                                                                                                                                                                                                                                                                                                                                                                   |

SCHOLARONE™  
Manuscripts

# How does multi-morbidity influence health care costs?

## A population-based cross-sectional study of depression, back pain and osteoarthritis

John Carstensen<sup>1</sup>, David Andersson<sup>2</sup>, Malin André<sup>2</sup>, Sven Engström<sup>2</sup>, Henrik Magnusson<sup>2</sup>,  
Lars Borgquist<sup>2</sup>

<sup>1</sup>Department of Medical and Health Sciences, Health and Society, Linköping University, Linköping, Sweden

<sup>2</sup> Department of Medical and Health Sciences, Family Medicine, Linköping University, SE 58183 Linköping, Sweden

Corresponding author: Lars Borgquist

e-mail: [lars.borgquist@liu.se](mailto:lars.borgquist@liu.se)

Key words: multi-morbidity, costs, depression, back pain, primary care

Word count : 2957

## ABSTRACT

**Objectives:** To analyse how multi-morbidity influences health care costs per patient based on three diagnoses, back pain, depression and osteoarthritis. A special focus was made on the distribution of costs for primary health care compared to specialist care, hospital care and drugs.

**Design:** Population-based, cross-sectional.

**Setting:** All residents of the County of Östergötland, Sweden visiting primary and secondary health care during 2006

**Patients:** Data on diagnoses and health care costs for all 266,354 individuals between 20 and 75 years of age, who were residents of the County of Östergötland, Sweden, in the year 2006, were extracted from the local health care register and the national register of drug prescriptions.

**Main outcome measures:** The effects of multi-morbidity on health care costs were estimated using regression models that also included age, sex and education.

**Results:** The average total health care costs associated with a diagnosis of depression and a diagnosis of back pain were significantly lower when one patient had both diagnoses when compared with two patients having one diagnosis each. This decrease in costs was largely related to hospital care, while the number of GP visits showed an increase. The multi-morbidity influence on health care costs tended to be less - not more - than additive, and, for back pain and depression, significantly less than additive.

**Conclusions:** Our results can be of value in analysing the cost effects of multi-morbidity and how the coordination of primary and secondary care may have an impact on health care costs.

## ARTICLE SUMMARY

### *Article focus*

Multi-morbidity is often associated with high health care costs and raises questions that are of interest for the organisation of primary and secondary health care, for example: What is the impact on health care costs?

1  
2  
3 Is there an increase in costs because the complexity is high in the management of the different  
4 diseases? Or maybe there is a decline in costs due to an efficient handling and therefore a  
5 lower numbers of health care contacts for single persons with many diseases?  
6  
7

### 8 9 *Key Messages*

10 Multi-morbidity does not generally increase health care costs per diagnosis

11  
12 The multi-morbidity influence on health care costs tended to be less - not more - than  
13 additive, and, for back pain and depression, significantly less than additive.  
14  
15  
16  
17  
18  
19  
20

### 21 *Strengths and limitations of this study*

22 The possibility to measure total health care utilisation on an individual level both in primary  
23 care and hospital care was an advantage in this study.  
24  
25  
26

27 There are the broad clinical variations in register data, for instance variations in the definition  
28 of diagnoses. An underreporting of diagnoses in the medical records is common, especially in  
29 primary care.  
30  
31  
32  
33  
34

## 35 **INTRODUCTION**

36  
37 Multi-morbidity – the simultaneous coexistence of multiple health conditions in a single  
38 individual is common in the general population and is particularly frequent among primary  
39 care patients [1]. Poly-pharmacy is high amongst elderly people who often suffer from multi-  
40 morbidity and from having had many hospital admissions [2 3].  
41  
42  
43  
44

45 Multi-morbidity is often associated with high health care costs and raises questions that are of  
46 interest for health services research, for example: What is the impact on health care costs? Is  
47 there an increase in costs because the complexity is high in the management of the different  
48 diseases? Or maybe there is a decline in costs due to several diseases in one patient being  
49 treated at the same consultation resulting in lower numbers of health care contacts than  
50 expected for single persons with many diseases?  
51  
52  
53  
54

55 The purpose of this study was to analyse how multi morbidity influences health care costs per  
56 patient based on three diagnoses, back pain, depression and osteoarthritis. A special focus was  
57  
58  
59  
60

1  
2  
3 made on the distribution of costs for primary health care compared to specialist care, hospital  
4 care and drugs. Analyses of multi-morbidity effects were from the perspective of health care  
5 professionals i.e. based on diagnoses. We have chosen the diagnoses depression, back pain  
6 and osteoarthritis because all of these health states are frequent problems both in primary care  
7 and in specialist care. Prior studies have reported a relatively large share of mental health  
8 conditions in patients with back pain [4-8]. Clinical associations between arthritis and  
9 depression have seldom been reported.  
10  
11  
12  
13

## 14 15 16 17 18 **METHODS** 19

### 20 21 *Data sources* 22

23  
24 Statistics Sweden has created a total population register for the country. This register is  
25 mainly used as a basic register for preparation of statistics in the Swedish counties and  
26 municipalities regarding the size and composition of their populations stratified according to  
27 sex, age, educational status, etc. In this population-based study we linked the population  
28 register to different registers of the residents of the County of Östergötland, situated in south-  
29 east Sweden. Individual data on clinical diagnosis, age, gender, socioeconomic status  
30 (education), drug prescriptions, drug costs and health care costs (primary care and hospital  
31 care) were made available, from these registers, for the whole population of the county. The  
32 personal identification numbers for people living in Sweden facilitate linking information  
33 from different registers. All individuals between 20 and 75 years of age, who were residents  
34 of the County of Östergötland in year 2006, were included in the multi-morbidity analysis.  
35  
36  
37  
38  
39  
40  
41  
42  
43  
44  
45

### 46 *Health care utilisation and diagnoses* 47

48 Health care contacts were collected with the help of The Care Data Warehouse in  
49 Östergötland [9]. This register consists of administrative records of all publicly financed  
50 health care utilisation in the county, including in-patient and out-patient care for all medical  
51 specialities (the register includes more than 95% of the health care utilisation in the county).  
52  
53  
54

55 All health care utilisation per patient during year 2006 was extracted and expressed by the  
56 following variables; total number of hospital days, total number of visits in out-patient care  
57  
58  
59  
60

1  
2  
3 including physician visits (hospital out-patient visits, GP visits) and visits to paramedical  
4 staff.  
5

6  
7 Using the information registered at all health care contacts in the year of 2006; individuals  
8 were classified as having depression if they at least once had a diagnosis of depression (F32-  
9 F39 according to the International Classification of Diseases, 10th version (ICD-10)). In a  
10 similar way individuals were defined as having osteoarthritis (M15-M19), or back pain (M50-  
11 M54).  
12  
13  
14

### 15 16 17 18 19 *Health care costs*

20  
21 The cost per patient (CPP) database of the Östergötland County Council contains data on  
22 costs for each patient utilising the healthcare system [9]. In the CPP database, clinic-specific  
23 costs are estimated for all healthcare services, e.g. a visit to a physician, a nurse or laboratory  
24 tests. Thus, it was possible, for example, to summarise the CPP for healthcare in different  
25 clinics and for each individual, over the years 2006 and 2007. Previous studies have proven its  
26 use in research [10].  
27  
28  
29  
30

31  
32 We added drug costs from the Swedish Prescribed Drug Register [11]. The Drug Register  
33 contains records of all dispensed drug prescriptions and covers the whole Swedish population.  
34 Measurement units of utilisation are the number of prescriptions, Defined Daily Doses  
35 (DDDs) and expenditures. The register contains data on drugs (the prescribed and dispensed  
36 amount per item and drug costs per individual). In this study all drugs dispensed to residents  
37 in the County of Östergötland during 2006 and 2007 were included.  
38  
39  
40  
41

42  
43 Three different kinds of costs were used in the analysis; primary care costs, hospital costs (in-  
44 patient and out-patient) and drug costs. All costs were on an individual basis and noted in  
45 SEK (2007).  
46  
47  
48  
49  
50

### 51 *Statistics*

52  
53 To examine how the different diagnoses affected health care costs (primary health care costs,  
54 hospital costs, drug costs, and total costs, respectively), multiple linear regression models  
55 were fitted with each of the diagnosis included as a dichotomous factor. The multi-morbidity  
56  
57  
58  
59  
60

1  
2  
3 effects on costs were estimated by including all two-way interaction terms between the  
4 diagnoses (depression x osteoarthritis, depression x back pain, osteoarthritis x back pain). A  
5 positive interaction term indicates that the multi-morbidity effect on costs is more than  
6 additive and a negative term indicates a less than additive effect on costs. Since the variability  
7 in costs was higher in patient groups with higher mean costs we used robust estimation of  
8 standard errors of the regression coefficients [12]. As there were differences in age, gender  
9 and education between the diagnoses groups (table 1) all regression models also included  
10 these factors as covariates [13].  
11  
12  
13  
14  
15  
16  
17  
18  
19

### 20 *Ethics*

21  
22 Confidentiality was ensured by one-way encrypted ID-numbers. The study was approved by  
23 the Regional Ethical Review Board in Linköping.  
24  
25  
26  
27  
28

## 29 **RESULTS**

30  
31 Characteristics of the study population (266 354 persons) are summarised in table 1. The  
32 largest diagnose group was back pain (11 178 patients) followed by depression (7 412  
33 patients) and osteoarthritis (5 174 patients). Elderly patients dominated in the osteoarthritis  
34 group and the youngest patients were found in the depression group. Total mean cost per  
35 patient with a depression diagnosis was SEK 36 904 (primary care SEK 5 715, hospital care  
36 SEK 25 633, drugs SEK 5 557). The largest multi-morbidity subgroup was the combination of  
37 back pain and depression (772 patients), followed by the combination of back pain and  
38 osteoarthritis (527 patients), and the combination of depression and osteoarthritis (206  
39 patients).  
40  
41  
42  
43  
44  
45  
46

47 In order to analyse how the combinations of diagnoses influence health care costs (primary  
48 health care costs, hospital costs and drug costs) multiple regression models were fitted table  
49 2). For patients having both a depression diagnosis and a back pain diagnosis there was a  
50 significant negative interaction effect on total health care costs, which indicates that the  
51 average total health care costs associated with a depression diagnosis and a back pain  
52 diagnosis were significantly lower when one patient had both diagnoses compared with two  
53 patients having one diagnosis each. Thus, the average health care costs associated with  
54  
55  
56  
57  
58  
59  
60

1  
2  
3 depression back pain was estimated to SEK 39 196 (24 763 + 14 433) when these two  
4 diagnoses are not in same patient while it was SEK 12 772 lower for the patient with both  
5 diagnoses. Significant negative interactions between depression and back pain were also  
6 observed for hospital and drug costs.  
7  
8  
9

10 Small or no interactions at all were seen between depression diagnoses and osteoarthritis  
11 diagnoses (table 2). For the multi-morbidity group consisting of osteoarthritis and back pain  
12 there was a positive not significant, interaction for drug costs.  
13  
14

15  
16 Costs in primary care and specialist out-patient care were associated with the number of  
17 physician visits. Therefore, multiple regression models were used to analyse how the  
18 combination of diagnoses affected the number of visits to health care (table 3). The  
19 combination of depression and back pain showed more than one strongly significant  
20 interaction. In this multi-morbidity group there was a positive interaction for GP visits, but  
21 there was a negative interaction for visits to the paramedical staff.  
22  
23  
24  
25  
26  
27  
28  
29  
30  
31

## 32 DISCUSSION

33

34  
35 The total health care costs associated with a depression diagnosis and a back pain diagnosis  
36 were significantly lower when one patient had both diagnoses compared with two patients  
37 having one diagnosis each. This decrease of costs was largely related to hospital care, while  
38 the number of GP visits showed an increase. The combination of osteoarthritis and back pain  
39 had no significant reduction in health care costs. No significant interactions were found  
40 between the diagnoses, osteoarthritis and depression. However, there was a non-significant  
41 increase in the drug costs for patients with both osteoarthritis and back pain compared to the  
42 expected costs for the separate diagnoses.  
43  
44  
45  
46  
47

48 Valderas et al [1] have mentioned three ways in which different diseases may be found in the  
49 same person; by chance, selection bias and by different kinds of causal association.  
50  
51

52  
53 In our total study population (266354) the prevalence for a back pain diagnosis was 4.2 % and  
54 for depression 2.9 %. So by chance alone about 330 persons ( $0.029 \times 0.042 \times 266354$ ) would  
55 have both depression and back pain. However, there were 772 persons with both depression  
56 and back pain. Selection bias might be an alternative explanation for this discrepancy. It is  
57  
58  
59  
60



1  
2  
3 likely that subjects already diagnosed with one disease tend to be detected in an earlier phase  
4 of another disease, since these patients will be under closer scrutiny, a phenomenon known as  
5 Berkson's bias [14]. There are also possible reasons for a high prevalence of multi-morbidity  
6 due to causal association among patients with a depression diagnosis and a back pain  
7 diagnosis. Common underlying bio-psychosocial conditions might be involved. In the  
8 transition from acute to longstanding pain, the influence of psychological factors, as, for  
9 example, depression and anxiety, have been acknowledged [15]. Prior studies have reported a  
10 relatively large share of mental health conditions in patients with back pain [16]. Both  
11 depression diagnoses and the back pain diagnoses are based on the patients' perceptions of  
12 disease and therefore the methods used in the diagnostic processes for these diagnoses differ  
13 from the more objective clinical methods used in diagnosing osteoarthritis (x-ray). Moreover,  
14 mental illness and back pain are common in middle-aged persons while osteoarthritis is more  
15 frequent in the elderly.  
16  
17  
18  
19  
20  
21  
22  
23  
24

25 Different kinds of associations between the three diagnoses were observed in earlier statistical  
26 analyses from the same data records used in this study [4]. With longitudinal data we found  
27 that an episode of back pain resulted in a higher hazard rate for depression. If a person was  
28 given a back pain diagnosis he/she had a 46 percent risk of later getting a depression  
29 diagnosis. However, little association was found between osteoarthritis and depression.  
30  
31  
32  
33

34 From other studies it is known that many diseases, for example diagnoses in the gastro-  
35 intestinal system and the musculoskeletal system are overrepresented in patients who receive  
36 antidepressant treatment [17]. A high level of drug use, especially treatment with  
37 antidepressants, has been found several years before a patient receiving a depression diagnosis  
38 [18]. It might be possible that some patients were presented with somatic complaints and a  
39 depressive health status before the depression diagnosis was made. Health care providers  
40 might have hesitated to record a depression diagnosis and instead used a variety of other  
41 diagnoses [19]. It is well-known that chronic somatic conditions and depression are  
42 associated.  
43  
44  
45  
46  
47  
48  
49

50 Depression alone is a cause of increased morbidity and mortality often associated with high  
51 health care costs, lost work productivity and an increased total health care utilisation [6].  
52 Increased expenditures for other health conditions before and after an incident of back pain in  
53 the same individuals have been reported; with, as a consequence, an increase in health care  
54  
55  
56  
57  
58  
59  
60

1  
2  
3 costs [7]. Clinical associations between osteoarthritis and depression have not been reported  
4 and no cost interactions were found in our analyses between these health states.  
5  
6

7 Glynn et al. [20] found, in a patient record review, that health care utilisation and cost in both  
8 primary and secondary care increased among patients with multi-morbidity. And costs  
9 increased with a higher number of chronic conditions. The multi-morbidity effect occurred  
10 independently of age, gender and socioeconomic status. However, the study did not  
11 differentiate between different kinds of diagnoses as we did in our study.  
12  
13  
14

15  
16 There might be some clinical reasons that interactions between diagnoses influence health  
17 care costs i.e. the costs tended to be less - not more - than additive. We found that the same  
18 kinds of drugs were used, to a very high extent, in the treatment of both back pain and  
19 depression. It is also possible that physicians could manage several different health states  
20 (diagnoses) in the same consultation. These circumstances might reduce drug utilisation and  
21 the number of health care contacts and thus the health care costs.  
22  
23  
24  
25  
26

27 In our analyses we found that patients with a back pain diagnosis had a high share of GP visits  
28 compared to patients with osteoarthritis who had relatively more visits to hospital specialists.  
29 This fact might be one explanation for the higher costs in primary care for patients with  
30 depression and back pain. The high frequency in GP visits was, however, followed by lower  
31 numbers of other visits (paramedical staff and physicians in special care), which on the other  
32 hand might be a sign of less optimal paramedical care for this patient group.  
33  
34  
35  
36  
37

38 Patients with back pain diagnosis and depression diagnosis, to a very high extent, received the  
39 same kind of drug treatment. Hence, the top-ten list for drugs was almost identical for the two  
40 diagnoses which could explain the decrease in expected drug costs. However, the same goes  
41 for the diagnoses back pain and osteoarthritis, where this expected reduction in drug costs was  
42 not seen.  
43  
44  
45  
46  
47  
48

#### 49 *Methodological considerations*

50  
51 The strengths of this study were the use of different register databases and the linkage to other  
52 registers. The possibility to follow total health care utilisation on an individual level both in  
53 primary care and hospital care was an advantage in this study. When using registers, sources  
54 of bias such as recall bias and response bias could be kept at a minimum. An additional  
55 strength was the size of the study, with more than 11 000 patients having a back pain  
56  
57  
58  
59  
60

1  
2  
3 diagnosis, 7 000 patients with a depression diagnosis and 5 000 patients with an osteoarthritis  
4 diagnosis. Some of the subgroups of multi-morbidity were, however, rather small in size and  
5 standard deviations were also larger. Hence, robust estimation of standard errors of the  
6 regression coefficients was used.  
7  
8

9  
10 A weakness of using registers is the quality of data and the broad clinical variation, for  
11 instance variation in the definition of depression. An underreporting of diagnoses in the  
12 medical records is common, especially in primary care. Besides, it is possible that mental  
13 health status may have been underreported because of the existence of multi-morbidity. Other  
14 health problems may have been prioritised in the recording of the diagnoses.  
15  
16  
17

18  
19 Although patients with a depression diagnosis are likely to be heavy users of health care,  
20 other factors should be considered. Patients with low socioeconomic status and female gender  
21 usually have a high use of health care resources, and it is well-known that women have a high  
22 incidence and prevalence of depressive disorders [21]. However, we adjusted for these  
23 potential confounders.  
24  
25  
26  
27

### 28 29 30 *Implications*

31  
32 The management, organisational structure and coordination of diagnoses in health care will  
33 have an impact on health care costs.  
34  
35

36  
37 In Sweden there is no gate-keeping system but still it is difficult for a patient, without a  
38 referral from a GP, to see a specialist in the hospital. A referral from a GP might facilitate  
39 contacts with a specialist if there are precise criteria for diagnosis and treatment which is the  
40 case in diagnosing osteoarthritis. Thus, gate-keeping and referral systems will influence the  
41 number of physician visits at different health care levels.  
42  
43  
44

45  
46 National and regional guidelines also have an impact on the localisation of care. For example  
47 the new Swedish guidelines for osteoarthritis in the knee and in the hip encourage primary  
48 care to take a greater part of the care for osteoarthritis [22]. The new guidelines will probably  
49 change the distribution of health care costs between hospital specialist care and primary care.  
50  
51  
52

53  
54 In hospital specialist care there is often focus on a single disease and no tradition for handling  
55 multi-morbidity. In our study the osteoarthritis patients were largely handled by hospital  
56 specialists. Hence, for this patient group and its multi-morbidities there might have been less  
57  
58  
59  
60

1  
2  
3 coordination between the disease specific treatment and other health care treatments. In the  
4 analyses we found no cost reductions in the combinations between osteoarthritis and the other  
5 two diseases.  
6  
7

8  
9 Patients with the two diagnoses, depression and back pain, paid relatively more visits to  
10 primary care and many of the health care visits included the paramedical personnel.  
11 Therefore, depression and back pain were handled to a great extent by GPs and for these  
12 combinations significant reductions in all types of costs were seen. Hence, in the management  
13 of multi morbidities there might be opportunities for coordinating these health care processes  
14 within primary care in order to reduce costs [23].  
15  
16  
17  
18  
19

### 20 21 *Conclusion*

22  
23 The multi-morbidity influence on health care costs tended to be less - not more - than  
24 additive, and, for back pain and depression, significantly less than additive. This indicates that  
25 multi-morbidity does not generally increase health care costs per diagnosis. Further studies  
26 are needed to clarify conditions for an effective health care for patients with multi-morbidity.  
27 There are different ways of organising health care in other countries. Therefore, international  
28 comparisons with the same kind of diagnoses used in this study might be of interest in future  
29 research in order to evaluate potential additive effects. Can our finding of opposite multi-  
30 morbidity effects for depression and back pain on GP visits and hospital costs be replicated in  
31 other health care systems? The coordination between primary and secondary care and the  
32 financial responsibility for diseases within health care will have an impact on health care  
33 costs. A primary health care responsibility for the whole health care process might be one way  
34 to reduce total health care costs where multi-morbidity is involved.  
35  
36  
37  
38  
39  
40  
41  
42  
43

44 **Acknowledgement** We thank Geoffrey Dykes for excellent help with English grammar and  
45 spelling.  
46

47 **Funding** This research received no specific grant from any funding agency in the public,  
48 commercial or not-for-profit sectors.  
49

50 **Competing interests** None  
51

52 **Ethical approval** The study was approved by the Regional Ethical Review Board in  
53 Linköping Sweden.  
54  
55  
56  
57  
58  
59  
60

1  
2  
3 **Contributors** JC, DA and LB designed the study. LB and HM performed the acquisition of  
4 data. JC, DA and LB performed the analyses. JC, DA, MA, SE, HM and LB participated in  
5 the interpretation of data. JC, DA and LB drafted the manuscript. JC, DA, MA, SE, HM and  
6 LB revised the manuscript until its final version.  
7  
8  
9

10  
11 **Data sharing statement** There is no additional data available.  
12  
13  
14  
15  
16  
17  
18  
19  
20  
21  
22  
23  
24  
25  
26  
27  
28  
29  
30  
31  
32  
33  
34  
35  
36  
37  
38  
39  
40  
41  
42  
43  
44  
45  
46  
47  
48  
49  
50  
51  
52  
53  
54  
55  
56  
57  
58  
59  
60

**Table 1.** Characteristics of the study population and diagnoses groups (2006). Percent and mean costs (SEK 2007) \*

|                   |               | Total population | Depression | Arthrosis | Back pain | Dep and BP | Dep and Arth | Arth and BP |
|-------------------|---------------|------------------|------------|-----------|-----------|------------|--------------|-------------|
|                   | n             | 266354           | 7712       | 5174      | 11178     | 772        | 208          | 527         |
| Gender            |               |                  |            |           |           |            |              |             |
|                   | Male          | 51,0             | 33,1       | 40,0      | 42,6      | 69,8       | 78,8         | 63,9        |
|                   | Female        | 49,0             | 66,9       | 60,0      | 57,4      | 30,2       | 21,2         | 36,1        |
| Age               |               |                  |            |           |           |            |              |             |
|                   | 20-45         | 47,0             | 47,4       | 6,3       | 38,3      | 39,2       | 8,2          | 8,3         |
|                   | 46-65         | 39,7             | 41,1       | 54,9      | 47,6      | 48,4       | 58,7         | 59,0        |
|                   | 66-75         | 13,3             | 11,5       | 38,8      | 14,1      | 12,3       | 32,2         | 32,6        |
| Education         |               |                  |            |           |           |            |              |             |
|                   | Primary       | 20,9             | 23,7       | 34,4      | 27,9      | 29,0       | 36,5         | 39,1        |
|                   | Secondary     | 49,4             | 50,5       | 44,8      | 53,0      | 52,1       | 40,9         | 45,4        |
|                   | University    | 29,6             | 25,8       | 20,7      | 19,2      | 18,9       | 21,6         | 15,6        |
| Mean costs [2007] |               |                  |            |           |           |            |              |             |
|                   | Primary care  | 1816             | 5715       | 6936      | 5988      | 9045       | 10033        | 9481        |
|                   | Hospital care | 7155             | 25633      | 22544     | 15950     | 30607      | 34202        | 27736       |
|                   | Drug          | 2020             | 5557       | 5566      | 4215      | 7257       | 9384         | 8043        |
|                   | Total         | 10990            | 36904      | 35046     | 26152     | 46909      | 53619        | 45620       |

\* 46 patients had all three diagnoses

**Table 2.** Multi-morbidity effects on health care costs as estimated by multiple linear regression models (interactions). Regression coefficients  $\pm$  SE

|                     |                             | Primary HC costs  | Hospital costs      | Drug costs        | Total costs          |
|---------------------|-----------------------------|-------------------|---------------------|-------------------|----------------------|
| Gender              | Intercept                   | 1627 $\pm$ 47***  | 6585 $\pm$ 280***   | 1542 $\pm$ 58***  | 9755 $\pm$ 312***    |
|                     | Female                      | REF               |                     |                   |                      |
| Age                 | Men                         | -663 $\pm$ 27***  | -487 $\pm$ 162**    | -256 $\pm$ 47***  | -1405 $\pm$ 185***   |
|                     | 20-45                       | REF               |                     |                   |                      |
|                     | 46-65                       | 819 $\pm$ 22***   | 2178 $\pm$ 169***   | 1181 $\pm$ 52***  | 4178 $\pm$ 191***    |
| Education           | 66-75                       | 2683 $\pm$ 77***  | 8723 $\pm$ 352***   | 2785 $\pm$ 69***  | 14191 $\pm$ 397***   |
|                     | Primary                     | REF               |                     |                   |                      |
|                     | Secondary                   | -434 $\pm$ 45***  | -2202 $\pm$ 267***  | -409 $\pm$ 57***  | -3045 $\pm$ 298***   |
| Diagnosis           | University                  | -840 $\pm$ 44***  | -3564 $\pm$ 270***  | -743 $\pm$ 60***  | -5147 $\pm$ 302***   |
|                     | Depression                  | 3143 $\pm$ 162*** | 18472 $\pm$ 1182*** | 3148 $\pm$ 150*** | 24763 $\pm$ 1260***  |
|                     | Osteoarthritis              | 4065 $\pm$ 160*** | 12426 $\pm$ 829***  | 2395 $\pm$ 198*** | 18887 $\pm$ 953***   |
|                     | Back pain                   | 4033 $\pm$ 92***  | 8419 $\pm$ 531***   | 1980 $\pm$ 109*** | 14433 $\pm$ 593***   |
| <b>Interactions</b> |                             |                   |                     |                   |                      |
|                     | Depression & Osteoarthritis | -49 $\pm$ 1483    | -2798 $\pm$ 7262    | -50 $\pm$ 932     | -2897 $\pm$ 8046     |
|                     | Depression & Back pain      | -797 $\pm$ 624    | -10426 $\pm$ 3223** | -1548 $\pm$ 580** | -12772 $\pm$ 3624*** |
|                     | Osteoarthritis & Back pain  | -769 $\pm$ 573    | -2307 $\pm$ 3211    | 851 $\pm$ 821     | -2225 $\pm$ 3731     |

\*=p<0.05 \*\*=p<0.01 \*\*\*p<0.001

**Table 3.** Multi-morbidity effects on health care visits as estimated by multiple linear regression models (interactions). Regression coefficients  $\pm$  SE

|                     |                             | GP                   | Hospital specialists | Paramedical, primary care | Paramedical hospital |
|---------------------|-----------------------------|----------------------|----------------------|---------------------------|----------------------|
| Gender              | Intercept                   | 1,07 $\pm$ 0,009***  | 1,11 $\pm$ 0,022***  | 1,64 $\pm$ 0,055***       | 2,45 $\pm$ 0,044***  |
|                     | Female                      | REF                  | REF                  | REF                       | REF                  |
| Age                 | Men                         | -0,33 $\pm$ 0,006*** | -0,22 $\pm$ 0,015*** | -0,46 $\pm$ 0,038***      | -0,91 $\pm$ 0,030*** |
|                     | 20-45                       | REF                  | REF                  | REF                       | REF                  |
|                     | 46-65                       | 0,14 $\pm$ 0,007***  | 0,14 $\pm$ 0,016***  | 0,75 $\pm$ 0,041***       | -0,31 $\pm$ 0,033*** |
| Education           | 66-75                       | 0,44 $\pm$ 0,010***  | 0,73 $\pm$ 0,024***  | 2,90 $\pm$ 0,059***       | -0,09 $\pm$ 0,047    |
|                     | Primary                     | REF                  | REF                  | REF                       | REF                  |
|                     | Secondary                   | -0,08 $\pm$ 0,008*** | -0,17 $\pm$ 0,020*** | -0,59 $\pm$ 0,049***      | -0,23 $\pm$ 0,039*** |
| Diagnosis           | University                  | -0,23 $\pm$ 0,009*** | -0,21 $\pm$ 0,022*** | -0,98 $\pm$ 0,055***      | -0,34 $\pm$ 0,044*** |
|                     | Depression                  | 0,67 $\pm$ 0,023***  | 0,84 $\pm$ 0,056***  | 1,87 $\pm$ 0,140***       | 4,02 $\pm$ 0,111***  |
|                     | Osteoarthritis              | 0,68 $\pm$ 0,023***  | 0,90 $\pm$ 0,055***  | 2,44 $\pm$ 0,138***       | 1,32 $\pm$ 0,109***  |
|                     | Back pain                   | 0,93 $\pm$ 0,016***  | 0,66 $\pm$ 0,038***  | 1,88 $\pm$ 0,095***       | 1,39 $\pm$ 0,075***  |
| <b>Interactions</b> |                             |                      |                      |                           |                      |
|                     | Depression & Osteoarthritis | -0,09 $\pm$ 0,159    | -0,46 $\pm$ 0,383    | 0,16 $\pm$ 0,957          | 1,50 $\pm$ 0,759*    |
|                     | Depression & Back pain      | 0,31 $\pm$ 0,087***  | -0,30 $\pm$ 0,210    | -0,40 $\pm$ 0,524         | -1,48 $\pm$ 0,416*** |
|                     | Osteoarthritis & Back pain  | -0,15 $\pm$ 0,072*   | 0,07 $\pm$ 0,173     | 0,22 $\pm$ 0,433          | 0,28 $\pm$ 0,343     |

\*=p<0.05 \*\*=p<0.01 \*\*\*p<0.001

## REFERENCES

1. Valderas JM, Starfield B, Sibbald B, *et al.* Defining comorbidity: implications for understanding health and health services. *Ann Fam Med* 2009;**7**(4):357-63.
2. Fortin M, Lapointe L, Hudon C, *et al.* Multimorbidity is common to family practice: is it commonly researched? *Can Fam Physician* 2005;**51**:244-5.
3. Starfield B, Lemke KW, Herbert R, *et al.* Comorbidity and the use of primary care and specialist care in the elderly. *Ann Fam Med* 2005;**3**(3):215-22.
4. Andersson D. Register-based studies of health care utilization prior to a depression diagnosis and of depression co-morbidities. Linköping, 2010.
5. Nimgade A, McNeely E, Milton D, *et al.* Increased expenditures for other health conditions after an incident of low back pain. *Spine (Phila Pa 1976)*; **35**(7):769-77.
6. Ustun TB, Ayuso-Mateos JL, Chatterji S, *et al.* Global burden of depressive disorders in the year 2000. *Br J Psychiatry* 2004;**184**:386-92.
7. Ritzwoller DP, Crouse L, Shetterly S, *et al.* The association of comorbidities, utilization and costs for patients identified with low back pain. *BMC Musculoskelet Disord* 2006;**7**:72.
8. Power C, Frank J, Hertzman C, *et al.* Predictors of low back pain onset in a prospective British study. *Am J Public Health* 2001;**91**(10):1671-8.
9. Wirehn AB, Andersson A, Ostgren CJ, *et al.* Age-specific direct healthcare costs attributable to diabetes in a Swedish population: a register-based analysis. *Diabet Med* 2008;**25**(6):732-7.
10. Tinghog G, Carlsson P, Synnerstad I, *et al.* Societal cost of skin cancer in Sweden in 2005. *Acta Derm Venereol* 2008;**88**(5):467-73.
11. Wettermark B, Hammar N, Fored CM, *et al.* The new Swedish Prescribed Drug Register--opportunities for pharmacoepidemiological research and experience from the first six months. *Pharmacoepidemiol Drug Saf* 2007;**16**(7):726-35.
12. White H. A heteroskedasticity-consistent covariance matrix estimator and a direct test for heteroskedasticity. *Econometrica* 1980;**48**:817-36.
13. Armitage P, Berry G, Matthews J. *Statistical Methods in Medical Research*. 4th ed: Blackwell, 2002.
14. Berkson J. Limitations of the application of fourfold table analysis to hospital data. *Biometrics* 1946;**2**(3):47-53.
15. Keefe FJ, Rumble ME, Scipio CD, *et al.* Psychological aspects of persistent pain: current state of the science. *J Pain* 2004;**5**(4):195-211.
16. Carroll LJ, Cassidy JD, Cote P. Factors associated with the onset of an episode of depressive symptoms in the general population. *J Clin Epidemiol* 2003;**56**(7):651-8.
17. Benton T, Staab J, Evans DL. Medical co-morbidity in depressive disorders. *Ann Clin Psychiatry* 2007;**19**(4):289-303.
18. Bingeors C. Antidepressant-treated patients. Population-based longitudinal studies. Uppsala, 1996.
19. Andersson D, Magnusson H, Carstensen J, *et al.* Co-morbidity and health care utilisation five years prior to diagnosis for depression. A register-based study in a Swedish population. *BMC Public Health*; **11**:552.
20. Glynn LG, Valderas JM, Healy P, *et al.* The prevalence of multimorbidity in primary care and its effect on health care utilization and cost. *Fam Pract*; **28**(5):516-23.
21. Gilman SE, Kawachi I, Fitzmaurice GM, *et al.* Socioeconomic status in childhood and the lifetime risk of major depression. *Int J Epidemiol* 2002;**31**(2):359-67.
22. Welfare TNBoHa. National guidelines for musculoskeletal diseases in Sweden. Stockholm, 2010.



- 1  
2  
3 23. Engstrom SG, Carlsson L, Ostgren CJ, *et al.* The importance of comorbidity in analysing  
4 patient costs in Swedish primary care. BMC Public Health 2006;6:36.  
5  
6  
7  
8  
9  
10  
11  
12  
13  
14  
15  
16  
17  
18  
19  
20  
21  
22  
23  
24  
25  
26  
27  
28  
29  
30  
31  
32  
33  
34  
35  
36  
37  
38  
39  
40  
41  
42  
43  
44  
45  
46  
47  
48  
49  
50  
51  
52  
53  
54  
55  
56  
57  
58  
59  
60

STROBE 2007 (v4) Statement—Checklist of items that should be included in reports of *cross-sectional studies*

| Section/Topic                | Item # | Recommendation                                                                                                                                                                       | Reported on page # |
|------------------------------|--------|--------------------------------------------------------------------------------------------------------------------------------------------------------------------------------------|--------------------|
| Title and abstract           | 1      | (a) Indicate the study's design with a commonly used term in the title or the abstract                                                                                               | 1,2                |
|                              |        | (b) Provide in the abstract an informative and balanced summary of what was done and what was found                                                                                  | 2                  |
| <b>Introduction</b>          |        |                                                                                                                                                                                      |                    |
| Background/rationale         | 2      | Explain the scientific background and rationale for the investigation being reported                                                                                                 | 3                  |
| Objectives                   | 3      | State specific objectives, including any prespecified hypotheses                                                                                                                     | 3-4                |
| <b>Methods</b>               |        |                                                                                                                                                                                      |                    |
| Study design                 | 4      | Present key elements of study design early in the paper                                                                                                                              | 4-5                |
| Setting                      | 5      | Describe the setting, locations, and relevant dates, including periods of recruitment, exposure, follow-up, and data collection                                                      | 4-5                |
| Participants                 | 6      | (a) Give the eligibility criteria, and the sources and methods of selection of participants                                                                                          | 4                  |
| Variables                    | 7      | Clearly define all outcomes, exposures, predictors, potential confounders, and effect modifiers. Give diagnostic criteria, if applicable                                             | 4-5                |
| Data sources/<br>measurement | 8*     | For each variable of interest, give sources of data and details of methods of assessment (measurement). Describe comparability of assessment methods if there is more than one group | 4-5                |
| Bias                         | 9      | Describe any efforts to address potential sources of bias                                                                                                                            | na                 |
| Study size                   | 10     | Explain how the study size was arrived at                                                                                                                                            | na                 |
| Quantitative variables       | 11     | Explain how quantitative variables were handled in the analyses. If applicable, describe which groupings were chosen and why                                                         | 5-6                |
| Statistical methods          | 12     | (a) Describe all statistical methods, including those used to control for confounding                                                                                                | 5-6                |
|                              |        | (b) Describe any methods used to examine subgroups and interactions                                                                                                                  | 5-6                |
|                              |        | (c) Explain how missing data were addressed                                                                                                                                          | na                 |
|                              |        | (d) If applicable, describe analytical methods taking account of sampling strategy                                                                                                   | na                 |
|                              |        | (e) Describe any sensitivity analyses                                                                                                                                                | na                 |
| <b>Results</b>               |        |                                                                                                                                                                                      |                    |
| Participants                 | 13*    | (a) Report numbers of individuals at each stage of study—eg numbers potentially eligible, examined for eligibility, confirmed eligible,                                              | na                 |

|                          |     |                                                                                                                                                                                                                 |              |
|--------------------------|-----|-----------------------------------------------------------------------------------------------------------------------------------------------------------------------------------------------------------------|--------------|
|                          |     | included in the study, completing follow-up, and analysed                                                                                                                                                       |              |
|                          |     | (b) Give reasons for non-participation at each stage                                                                                                                                                            | na           |
|                          |     | (c) Consider use of a flow diagram                                                                                                                                                                              | na           |
| Descriptive data         | 14* | (a) Give characteristics of study participants (eg demographic, clinical, social) and information on exposures and potential confounders                                                                        | Table 1      |
|                          |     | (b) Indicate number of participants with missing data for each variable of interest                                                                                                                             | na           |
| Outcome data             | 15* | Report numbers of outcome events or summary measures                                                                                                                                                            | Table 1      |
| Main results             | 16  | (a) Give unadjusted estimates and, if applicable, confounder-adjusted estimates and their precision (eg, 95% confidence interval).<br>Make clear which confounders were adjusted for and why they were included | Tables 2-3   |
|                          |     | (b) Report category boundaries when continuous variables were categorized                                                                                                                                       | Tables (age) |
|                          |     | (c) If relevant, consider translating estimates of relative risk into absolute risk for a meaningful time period                                                                                                | na           |
| Other analyses           | 17  | Report other analyses done—eg analyses of subgroups and interactions, and sensitivity analyses                                                                                                                  | na           |
| <b>Discussion</b>        |     |                                                                                                                                                                                                                 |              |
| Key results              | 18  | Summarise key results with reference to study objectives                                                                                                                                                        | 7            |
| Limitations              | 19  | Discuss limitations of the study, taking into account sources of potential bias or imprecision. Discuss both direction and magnitude of any potential bias                                                      | 9-10         |
| Interpretation           | 20  | Give a cautious overall interpretation of results considering objectives, limitations, multiplicity of analyses, results from similar studies, and other relevant evidence                                      | 7-11         |
| Generalisability         | 21  | Discuss the generalisability (external validity) of the study results                                                                                                                                           | 11           |
| <b>Other information</b> |     |                                                                                                                                                                                                                 |              |
| Funding                  | 22  | Give the source of funding and the role of the funders for the present study and, if applicable, for the original study on which the present article is based                                                   | na           |

\*Give information separately for cases and controls in case-control studies and, if applicable, for exposed and unexposed groups in cohort and cross-sectional studies.

**Note:** An Explanation and Elaboration article discusses each checklist item and gives methodological background and published examples of transparent reporting. The STROBE checklist is best used in conjunction with this article (freely available on the Web sites of PLoS Medicine at <http://www.plosmedicine.org/>, Annals of Internal Medicine at <http://www.annals.org/>, and Epidemiology at <http://www.epidem.com/>). Information on the STROBE Initiative is available at [www.strobe-statement.org](http://www.strobe-statement.org).
